# Supplementary material for: 3d–4f Heterometallic coordination polymers constructed by tetranuclear lanthanide-based cluster as secondary building unit
Source: Royal Society of Chemistry journal article supplement (doi:10.1039/c2ce26277k), 2012-11-13
Supplement: c2ce26277k.pdf [file c2ce26277k.pdf]

## Supporting Information

### 3d-4f heterometallic coordination polymers constructed by tetranuclear lanthanide-based cluster as secondary building unit

Guo Peng, Li Ma, Liang Li, Yingzhao Ma, Chengfeng Yang, Hong Deng\*

**Table S1** Selected bond lengths (Å) for compound **2** and **4**

| Compound <b>2</b> |          |               |          |
|-------------------|----------|---------------|----------|
| Gd(1)-O(13)#2     | 2.305(3) | Gd(1)-O(2)    | 2.409(3) |
| Gd(1)-O(5)#1      | 2.421(3) | Gd(1)-O(3)    | 2.441(3) |
| Gd(1)-O(9)#1      | 2.459(3) | Gd(1)-O(10)#1 | 2.511(3) |
| Gd(1)-N(1)        | 2.515(3) | Gd(1)-O(6)    | 2.525(3) |
| Gd(1)-O(5)        | 2.561(3) | Gd(2)-O(8)    | 2.401(3) |
| Gd(2)-O(6W)       | 2.402(3) | Gd(2)-O(11)   | 2.427(3) |
| Gd(2)-O(5W)       | 2.428(4) | Gd(2)-O(4W)   | 2.432(3) |
| Gd(2)-O(10)       | 2.459(3) | Gd(2)-O(4)    | 2.504(3) |
| Gd(2)-N(2)        | 2.528(3) | Gd(2)-O(3)    | 2.564(3) |
| Mn(1)-O(12)#3     | 2.143(3) | Mn(1)-O(12)   | 2.143(3) |
| Mn(1)-O(7W)       | 2.222(3) |               |          |
| Compound <b>4</b> |          |               |          |
| Tb(1)-O(2)        | 2.395(4) | Tb(1)-O(3)    | 2.422(3) |
| Tb(1)-O(5) #2     | 2.499(3) | Tb(1)-O(6) #2 | 2.442(3) |
| Tb(1)-O(10) #2    | 2.398(3) | Tb(1)-O(10)   | 2.542(3) |
| Tb(1)-O(11)       | 2.520(3) | Tb(1)-O(13)#1 | 2.290(4) |
| Tb(1)-N(1)        | 2.496(4) | Tb(2)-N(2)    | 2.503(4) |
| Tb(2)-O(3)        | 2.561(3) | Tb(2)-O(4)    | 2.491(3) |
| Tb(2)-O(5)        | 2.442(3) | Tb(2)-O(7)    | 2.424(3) |
| Tb(2)-O(9)        | 2.384(3) | Tb(2)-O(1W)   | 2.423(4) |
| Tb(2)-O(2W)       | 2.407(4) | Tb(2)-O(3W)   | 2.407(4) |
| Zn(1)-O(8)#3      | 2.074(3) | Zn(1)-N(3)#3  | 2.110(4) |
| Zn(1)-O(4W)#3     | 2.182(4) |               |          |

Symmetry codes: for **2** #1  $-x+1, -y+1, -z$ ; #2  $x-1, y-1, z$ ; #3  $-x+3, -y+2, -z+1$ ; for **4** #1  $x+1, y+1, z$ ; #2  $-x-1, -y, -z$ ; #3  $-x+1, -y+1, -z+1$ .

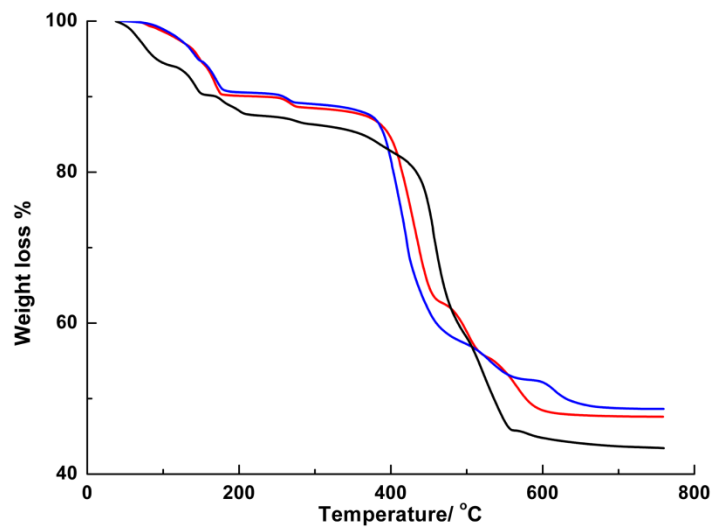

**Fig. S1** TGA curves of compound **1**(black), **3** (red) and **4** (blue).

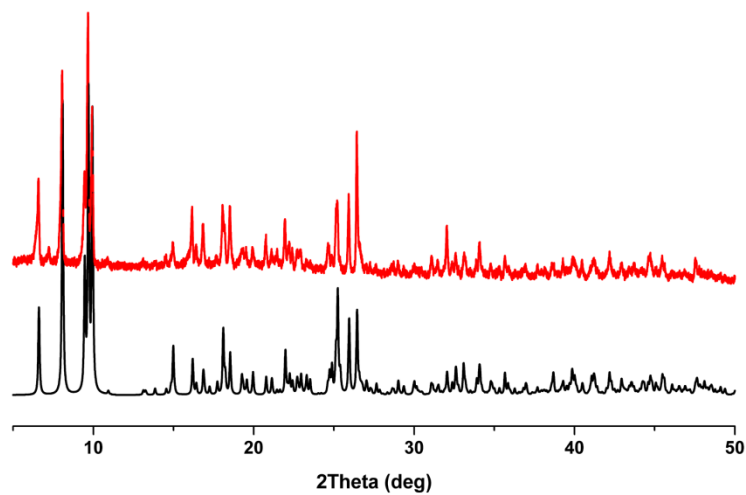

**Fig. S2** PXRD patterns for that simulated based on X-ray single-crystal diffraction data of **1** (black) and as-synthesized **1** (red).

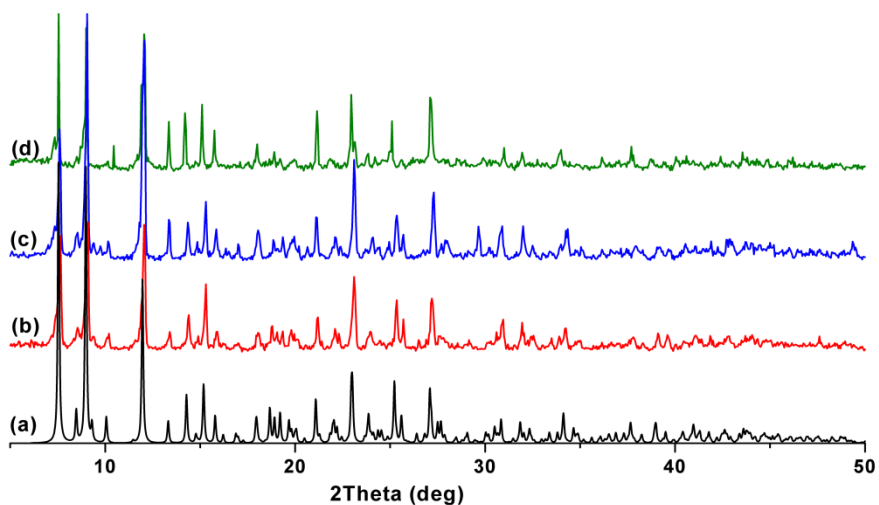

**Fig. S3** PXRd patterns for: a) compound **2**, as simulated based on X-ray single-crystal diffraction data; b) compound **2**, as synthesized; c) compound **3**, as synthesized; d) compound **4**, as synthesized.

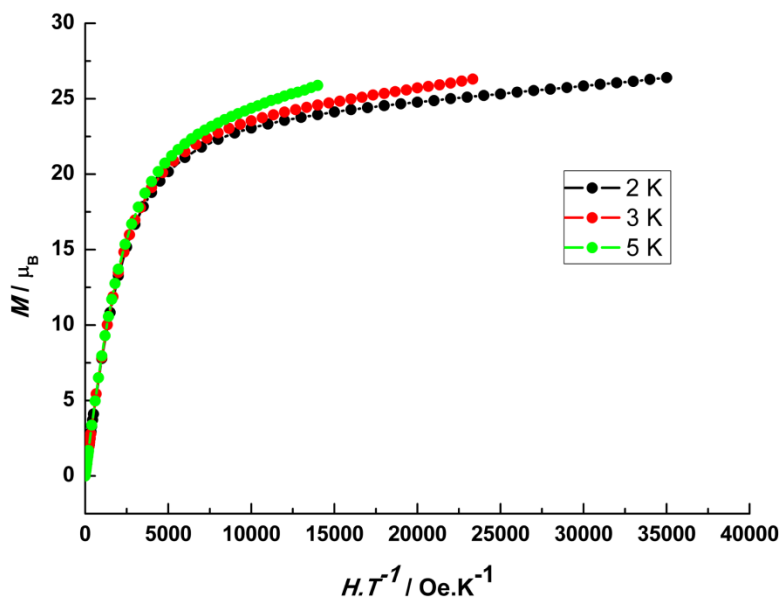

**Fig. S4** Plot of  $M$  vs.  $HT^{-1}$  for compound **1**.

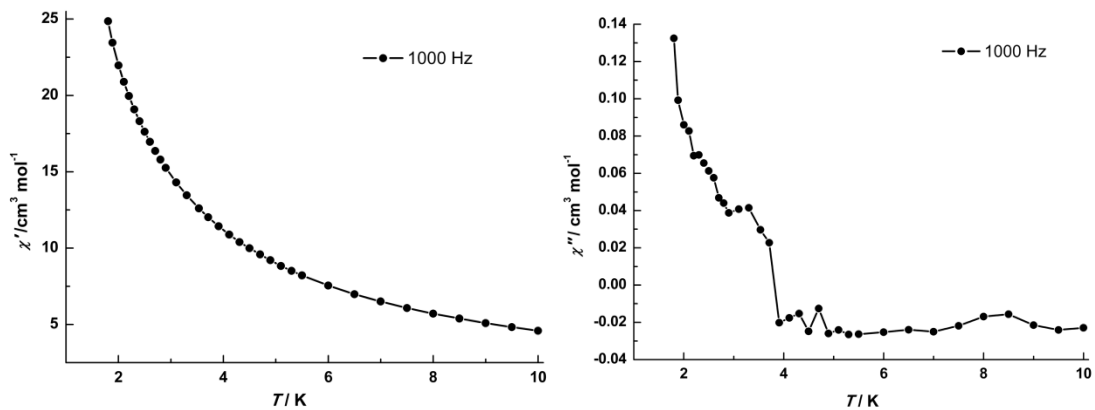

**Fig. S5** Temperature dependence of the in-phase and the out-of-phase ac susceptibility components at 1000 Hz under zero dc field for **1**

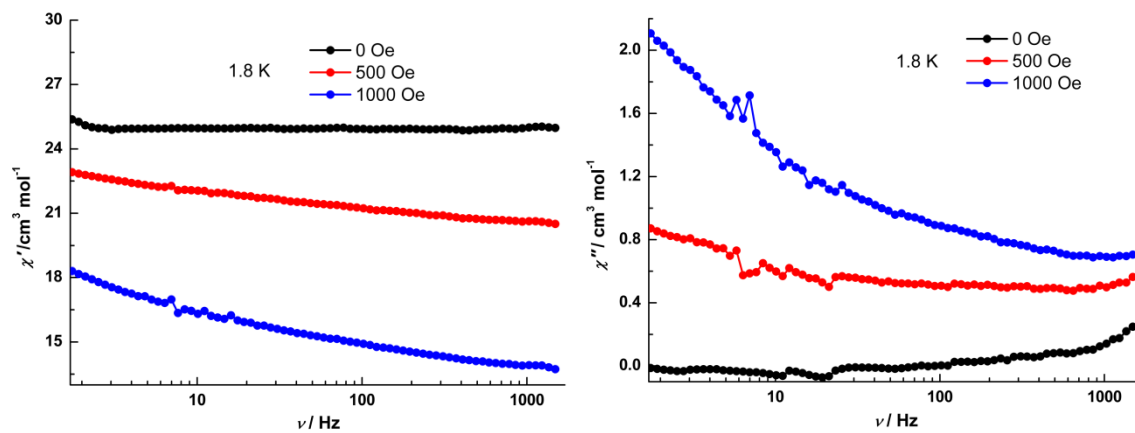

**Fig. S6** Frequency dependence of the in-phase and the out-of-phase ac susceptibility components at 1.8 K under different dc field for **1**.
